# Supplementary material
Source: PubMed Central journal article supplement (PMC5468655)
Supplement: pnas.1610612114.sd03.pdf [file pnas.1610612114.sd03.pdf]

| SN | Motifs | P-value  | Known motifs name |
|----|--------|----------|-------------------|
| 1  |        | 1.00E-43 | SOX9              |
| 2  |        | 1.00E-39 | E2F3              |
| 3  |        | 1.00E-37 | Nanog             |
| 4  |        | 1.00E-27 | Smad3             |
| 5  |        | 1.00E-35 | TATA-Box          |
| 6  |        | 1.00E-26 | ETS:E-box         |
| 7  |        | 1.00E-24 | Klf4              |
| 8  |        | 1.00E-22 | RARg(NR)          |
| 9  |        | 1.00E-19 | REST-NRSF(Zf)     |
| 10 |        | 1.00E-18 | E2F1(E2F)         |
| 11 |        | 1.00E-18 | BORIS(Zf)         |
| 12 |        | 1.00E-18 | ELK1              |

|    |                     |          |                    |
|----|---------------------|----------|--------------------|
| 13 | <b>GAGCAACGAATC</b> | 1.00E-16 | Rfxdc2             |
| 14 | <b>GCTGTCACGCCA</b> | 1.00E-16 | Sreb2(bHLH)        |
| 15 | <b>AAGATGGCCCTG</b> | 1.00E-16 | YY1                |
| 16 | <b>TCCACCCTAGGT</b> | 1.00E-16 | Zfp423             |
| 17 | <b>TGGGGTGATGGG</b> | 1.00E-15 | SREBF2             |
| 18 | <b>CCATTTCCCACC</b> | 1.00E-15 | Sox13              |
| 19 | <b>CCAGCCCATAGG</b> | 1.00E-15 | Tcfap2a            |
| 20 | <b>CCCTATCCTGCA</b> | 1.00E-15 | ETS:RUNX(ETS,Runt) |
| 21 | <b>TACCTGATTG</b>   | 1.00E-15 | NFYB               |
| 22 | <b>AACAGGGGATAT</b> | 1.00E-14 | MZF1               |
| 23 | <b>TCAGGTGCTGAA</b> | 1.00E-13 | Tcfe2a             |
| 24 | <b>AAGTAGTAAACA</b> | 1.00E-12 | FOXP1(Forkhead)    |
| 25 | <b>GATGGATGGGA</b>  | 1.00E-12 | HOXA2              |
| 26 | <b>TTTGGCGC</b>     | 1.00E-12 | E2F2               |
