# Supplementary material
Source: PubMed Central journal article supplement (PMC5468655)
Supplement: pnas.1610612114.sd04.pdf [file pnas.1610612114.sd04.pdf]

| SN | Motifs | P-value | Known motif name |
|----|--------|---------|------------------|
| 1  |        | 1e-725  | Bach2            |
| 2  |        | 1e-707  | Gfi1b            |
| 3  |        | 1e-659  | Sox18            |
| 4  |        | 1e-560  | BORIS(Zf)        |
| 5  |        | 1e-559  | GABPA            |
| 6  |        | 1e-546  | Smad3(MAD)       |
| 7  |        | 1e-541  | Nkx2.5           |
| 8  |        | 1e-490  | Foxj1            |
| 9  |        | 1e-481  | Gata5            |
| 10 |        | 1e-429  | Hdx              |
| 11 |        | 1e-351  | Smad3(MAD)       |

|    |                                                                                     |           |           |
|----|-------------------------------------------------------------------------------------|-----------|-----------|
| 12 |    | 1e-342    | EHF       |
| 13 |    | 1e-319    | Zbtb3     |
| 14 |    | 0.00E+00  | NFkB-p65  |
| 15 |    | 1.00E-275 | Tcfap2a_2 |
| 16 |    | 1.00E-265 | Sox13_2   |
| 17 |   | 1.00E-237 | Myb       |
| 18 |  | 1.00E-223 | DCE       |
| 19 |  | 1.00E-183 | HOXA2     |
| 20 |  | 1.00E-139 | SOX9      |
| 21 |  | 1.00E-130 | Irx4      |
| 22 |  | 1.00E-118 | Foxj3     |

|    |  |           |                        |
|----|--|-----------|------------------------|
| 23 |  | 1.00E-108 | IRF4                   |
| 24 |  | 1.00E-97  | STAT5                  |
| 25 |  | 1.00E-94  | Oct2                   |
| 26 |  | 1.00E-83  | MITF(bHLH)             |
| 27 |  | 1.00E-72  | ZNF711(Zf)             |
| 28 |  | 1.00E-69  | At AC acceptor         |
| 29 |  | 1.00E-68  | Nuclear Receptor class |
| 30 |  | 1.00E-34  | Gm397                  |
| 31 |  | 1.00E-33  | NFE2L1::MafG           |
| 32 |  | 1.00E-32  | ZNF354C                |
| 33 |  | 1.00E-21  | Sox5                   |
